# Supplementary material for: High surface area mesoporous titanium–zirconium oxide nanofibrous web: a heavy metal ion adsorbent
Source: Royal Society of Chemistry journal article supplement (doi:10.1039/c3ta00030c), 2013-01-01
Supplement: c3ta00030c.pdf [file c3ta00030c.pdf]

Supplementary Information

## High Surface Area Mesoporous Titanium Zirconium Oxide Nanofibrous Web: A Heavy Metal Ion Adsorbent

Jonghyun Choi,<sup>a</sup> Andreas Ide,<sup>b,c</sup> Yen B. Truong,<sup>a</sup> Ilias L. Kyratzis<sup>a</sup> and Rachel A. Caruso<sup>\*a,b</sup>

<sup>a</sup> Materials Science and Engineering, Commonwealth Scientific and Industrial Research Organisation (CSIRO), Bayview Avenue, Clayton, VIC 3168 Australia

<sup>b</sup> School of Chemistry, The University of Melbourne, Melbourne, VIC 3010 Australia

<sup>c</sup> MR & CT Contrast Media Research, Bayer Pharma AG, Berlin 13342 Germany

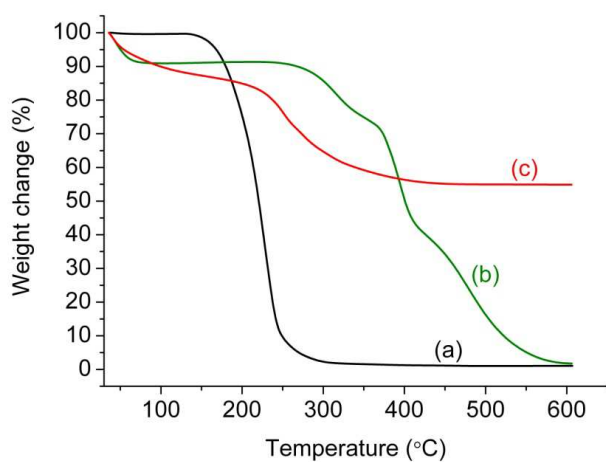

**Figure S1** Thermogravimetric analysis of (a) Pluronic P123, (b) polyvinylpyrrolidone (1.3M MW), and (c) electrospun nanofiber web (PVP/P123 = 22/78 w/w). Temperature: 30 – 600 °C, ramp rate: 1 °C min<sup>-1</sup>, under air atmosphere.

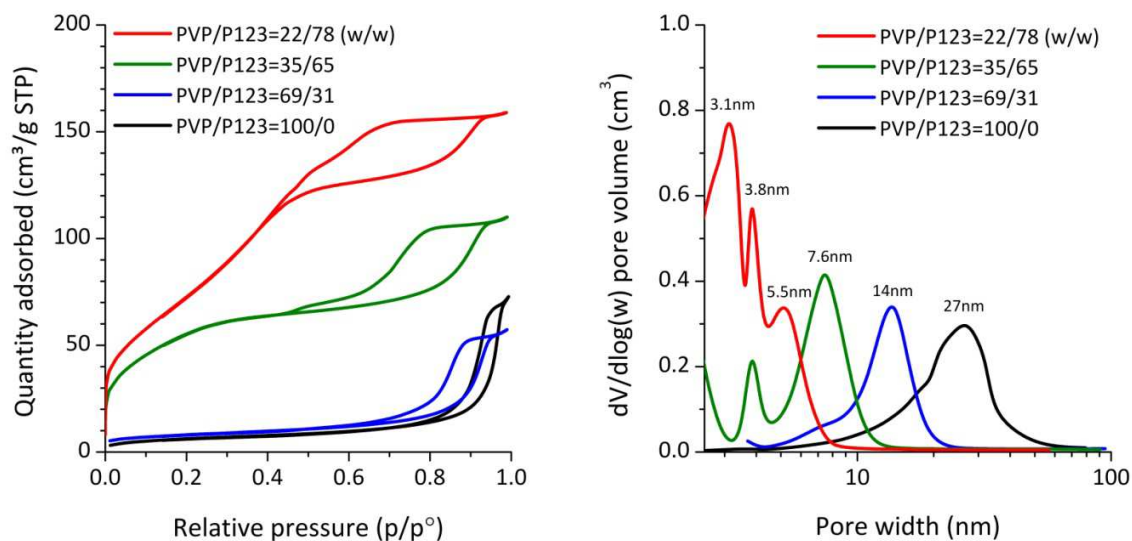

**Figure S2** Nitrogen sorption isotherms (left) and pore size distributions (right) of TiO<sub>2</sub>/ZrO<sub>2</sub> nanofibrous webs prepared from solutions varying in PVP/P123 ratio.

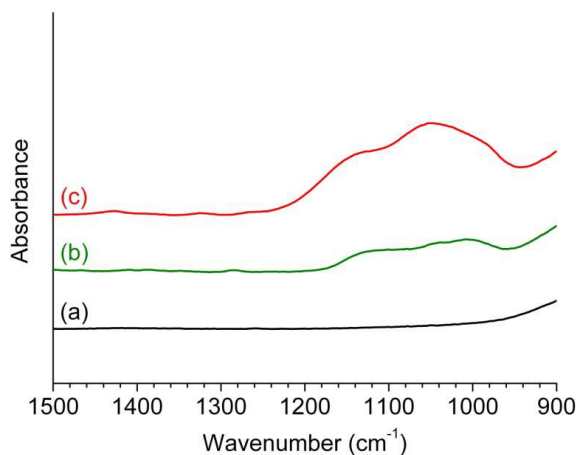

**Figure S3** IR spectra of (a) non-modified TiO<sub>2</sub>/ZrO<sub>2</sub> nanofibrous web, (b) amine-functionalised TiO<sub>2</sub>/ZrO<sub>2</sub> nanofibrous web and (c) phosphonate-functionalised TiO<sub>2</sub>/ZrO<sub>2</sub> nanofibrous web.

It clearly indicates the bonding between the nanofibre surface and phosphonate coupling molecules. While there are no bands in the range for the non-modified TiO<sub>2</sub>/ZrO<sub>2</sub> nanofibrous web, there are broad P-O stretching bands between 950 and 1200 cm<sup>-1</sup> for the functionalised samples. These are the characteristic bands for M (metal)-O-P and agree well with the literature (see below).

References:

- 1) 900 – 1200 cm<sup>-1</sup> (G. Guerrero et al., *Chem. Mater.* **2001**, *13*, 4367)
- 2) 900 – 1300 cm<sup>-1</sup> (G. Guerrero et al., *Chem. Mater.* **2000**, *12*, 1268)
- 3) 990 – 1250 cm<sup>-1</sup> (M.A. White et al., *J.Am.Chem.Soc.* **2006**, *128*, 11356)
